# Supplementary material
Source: PubMed Central journal article supplement (PMC2760082)
Supplement: NIHMS143249-supplement-1.pdf [file NIHMS143249-supplement-1.pdf]

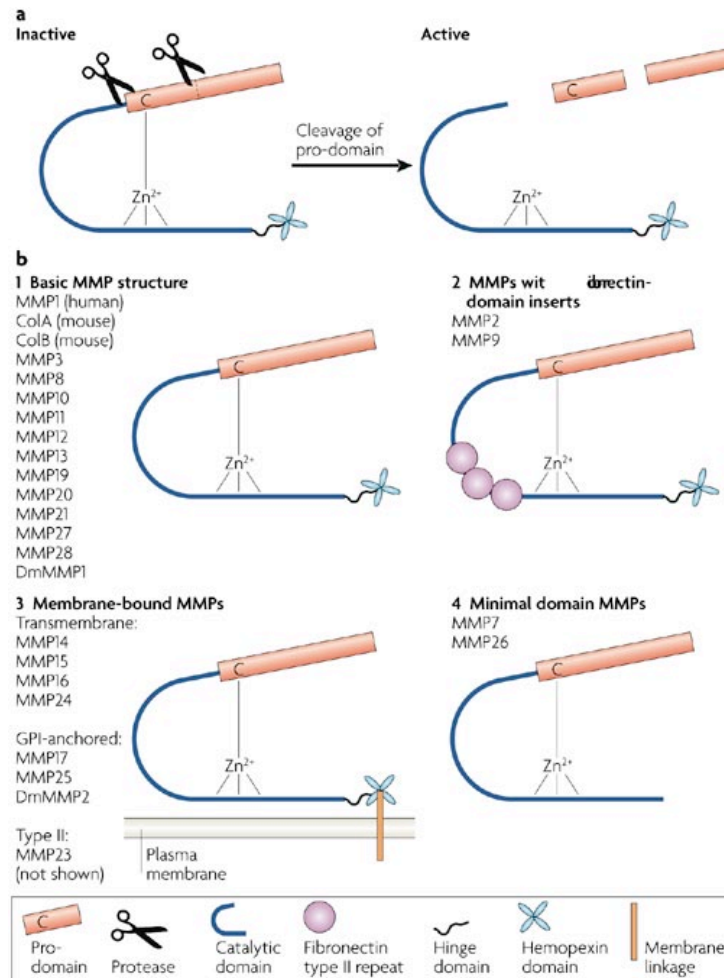

Nature Reviews | Molecular Cell Biology

Page-McCaw *et al.* *Nature Reviews Molecular Cell Biology* **8**, 221–233 (March 2007) | doi:10.1038/nrm2125
