# Supplementary material
Source: PubMed Central journal article supplement (PMC2760082)

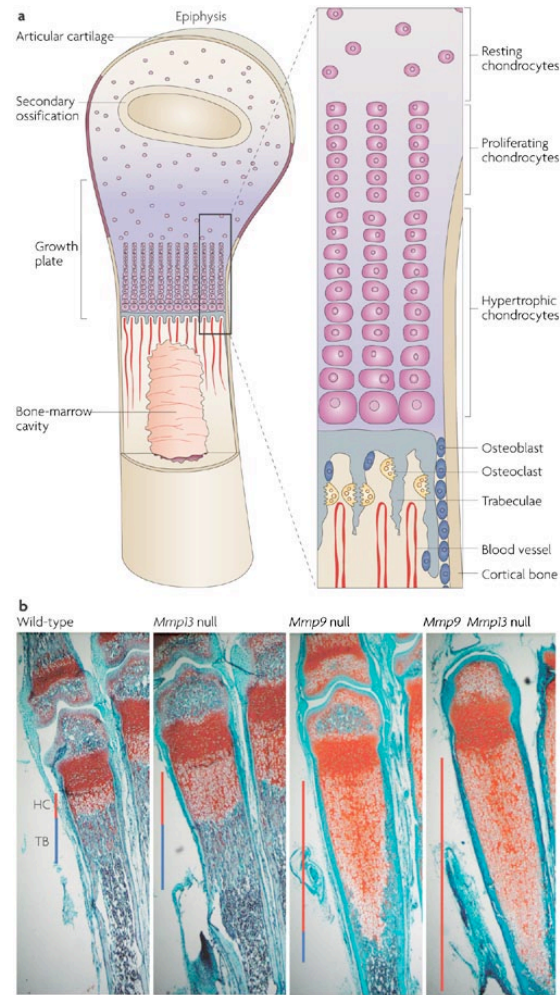

Nature Reviews | Molecular Cell Biology

Supplement: NIHMS143249-supplement-3.pdf [file NIHMS143249-supplement-3.pdf]
